# Supplementary material
Source: ML conference proceedings conference paper supplement (https://openaccess.thecvf.com/content/WACV2022/html/Wu_Generalized_Clustering_and_WACV_2022_paper.html)
Supplement: Supplementary file 1 [file Wu_Generalized_Clustering_and_WACV_2022_supplemental.pdf]

## Appendix

### A.1 Datasets

To show that our method works well with various kinds of datasets, we choose the following seven image and vector datasets. A brief description is given in Tab. A1.

(1). MNIST-full [8]: The MNIST-full dataset consists of 70000 handwritten digits of  $28 \times 28$  pixels. Each gray image is reshaped to a 784-dimensional vector.

(2). MNIST-test [8]: The MNIST-test is the testing part of MNIST dataset, which contains a total of 10000 samples.

(3). USPS: The USPS dataset is composed of 9298 gray-scale handwritten digit images with a size of  $16 \times 16$  pixels.

(4). Fashion-MNIST [23]: This Fashion-MNIST dataset has the same number of images and the same image size as MNIST-full, but it is fairly more complicated. Instead of digits, it consists of various types of fashion products.

(5). REUTERS-10K: REUTERS-10K is a subset of REUTERS with 10000 samples. Four root categories (corporate/industrial, government/social, markets, and economics) are used as labels, and the tf-idf features on the 2000 most frequent words are computed.

(6). HAR: HAR is a time-series dataset consisting of 10299 sensor samples from a smartphone. It was collected from 30 people performing six activities: walking, walking upstairs, walking downstairs, sitting, standing, and laying.

(7). Pendigits: HAR is a dataset consisting of 10992 samples from pressure-sensitive plates with ten different digits, each represented by 8 coordinates of the stylus.

Table A1. Description of Datasets.

| Dataset       | Samples | Categories | Data Size               |
|---------------|---------|------------|-------------------------|
| MNIST-full    | 70000   | 10         | $28 \times 28 \times 1$ |
| MNIST-test    | 10000   | 10         | $28 \times 28 \times 1$ |
| USPS          | 9298    | 10         | $16 \times 16 \times 1$ |
| Fashion-MNIST | 70000   | 10         | $28 \times 28 \times 1$ |
| REUTERS-10K   | 10000   | 4          | 2000                    |
| HAR           | 10299   | 6          | 561                     |
| Pendigits     | 10992   | 10         | 16                      |

### A.2 Gradient Derivation

In the paper, we have emphasized time and again that  $\{\mu_j\}_{j=1}^C$  is a set of *learnable* parameters, which means that we can optimize it while optimizing the network parameter  $\theta_f$ . In Eq. (4) of the paper, we have presented the gradient of  $L_{cluster}$  with respect to  $\mu_j$ . In addition to  $L_{cluster}$ , both  $L_{rank}$  and  $L_{align}$  are involving  $\mu_j$ . Hence, the detailed derivations for the gradient of  $L_{rank}$  and  $L_{align}$  with respect to  $\mu_j$  are also provided. The gradient of  $L_{rank}$  with respect to each cluster center  $\mu_j$  can be computed as:

$$\begin{aligned} \frac{\partial L_{rank}}{\partial \mu_j} &= \frac{\partial \sum_{i'=1}^C \sum_{j'=1}^C |d_Z(\mu_{i'}, \mu_{j'}) - \kappa * d_X(v_{i'}^X, v_{j'}^X)|}{\partial \mu_j} \\ &= \sum_{i'=1}^C \sum_{j'=1}^C \frac{\partial |d_Z(\mu_{i'}, \mu_{j'}) - \kappa * d_X(v_{i'}^X, v_{j'}^X)|}{\partial \mu_j} \end{aligned}$$

The Euclidean metric is used for both the input space and the hidden layer space, i.e.,  $d_Z(\mu_{i'}, \mu_{j'}) = \|\mu_{i'} - \mu_{j'}\|$ . In addition, the symbols are somewhat abused for clear derivation, representing  $\kappa * d_X(v_{i'}^X, v_{j'}^X)$  with  $K$ . Accordingly, the above equation can be further derived as follows:

$$\begin{aligned} \frac{\partial L_{rank}}{\partial \mu_j} &= \sum_{i'=1}^C \sum_{j'=1}^C \frac{\partial |d_Z(\mu_{i'}, \mu_{j'}) - \kappa * d_X(v_{i'}^X, v_{j'}^X)|}{\partial \mu_j} \\ &= \sum_{i'=1}^C \sum_{j'=1}^C \frac{\partial \|\mu_{i'} - \mu_{j'}\| - K}{\partial \mu_j} \\ &= \sum_{i'=1}^C \frac{\partial \|\mu_{i'} - \mu_j\| - K}{\partial \mu_j} + \sum_{j'=1}^C \frac{\partial \|\mu_j - \mu_{j'}\| - K}{\partial \mu_j} \\ &= \sum_{i'=1}^C \frac{\partial (\|\mu_{i'} - \mu_j\| - K)}{\partial \mu_j} \cdot \frac{\|\mu_{i'} - \mu_j\| - K}{\|\mu_{i'} - \mu_j\| - K} \\ &\quad + \sum_{j'=1}^C \frac{\partial (\|\mu_j - \mu_{j'}\| - K)}{\partial \mu_j} \cdot \frac{\|\mu_j - \mu_{j'}\| - K}{\|\mu_j - \mu_{j'}\| - K} \\ &= \sum_{i'=1}^C \frac{\partial \|\mu_{i'} - \mu_j\|}{\partial \mu_j} \cdot \frac{\|\mu_{i'} - \mu_j\| - K}{\|\mu_{i'} - \mu_j\| - K} \\ &\quad + \sum_{j'=1}^C \frac{\partial \|\mu_j - \mu_{j'}\|}{\partial \mu_j} \cdot \frac{\|\mu_j - \mu_{j'}\| - K}{\|\mu_j - \mu_{j'}\| - K} \\ &= \sum_{i'=1}^C \frac{\mu_j - \mu_{i'}}{\|\mu_j - \mu_{i'}\|} \cdot \frac{\|\mu_j - \mu_{i'}\| - K}{\|\mu_j - \mu_{i'}\| - K} \\ &\quad + \sum_{j'=1}^C \frac{\mu_j - \mu_{j'}}{\|\mu_j - \mu_{j'}\|} \cdot \frac{\|\mu_j - \mu_{j'}\| - K}{\|\mu_j - \mu_{j'}\| - K} \\ &= 2 \sum_{i'=1}^C \frac{\mu_j - \mu_{i'}}{\|\mu_j - \mu_{i'}\|} \cdot \frac{\|\mu_j - \mu_{i'}\| - K}{\|\mu_j - \mu_{i'}\| - K} \\ &= 2 \sum_{i'=1}^C \frac{\mu_j - \mu_{i'}}{\|\mu_j - \mu_{i'}\|} \cdot \frac{\|\mu_j - \mu_{i'}\| - \kappa * d_X(v_{i'}^X, v_{j'}^X)}{\|\mu_j - \mu_{i'}\| - \kappa * d_X(v_{i'}^X, v_{j'}^X)} \\ &= 2 \sum_{i'=1}^C \frac{\mu_j - \mu_{i'}}{d_Z(\mu_j, \mu_{i'})} \cdot \frac{d_Z(\mu_j, \mu_{i'}) - \kappa * d_X(v_{i'}^X, v_{j'}^X)}{d_Z(\mu_j, \mu_{i'}) - \kappa * d_X(v_{i'}^X, v_{j'}^X)} \end{aligned}$$

The gradient of  $L_{align}$  with respect to each learnable cluster center  $\mu_j$  can be computed as:

$$\begin{aligned}
\frac{\partial L_{align}}{\partial \mu_j} &= \frac{\partial \sum_{j'=1}^C \|\mu_{j'} - v_{j'}^Z\|}{\partial \mu_j} \\
&= \sum_{j'=1}^C \frac{\partial \|\mu_{j'} - v_{j'}^Z\|}{\partial \mu_j} \\
&= \frac{\partial \|\mu_j - v_j^Z\|}{\partial \mu_j} \\
&= \frac{\partial(\mu_j - v_j^Z)}{\partial \mu_j} \cdot \frac{\mu_j - v_j^Z}{\|\mu_j - v_j^Z\|} \\
&= \frac{\mu_j - v_j^Z}{\|\mu_j - v_j^Z\|}
\end{aligned}$$

### A.3 Definitions of Performance Metrics

The following notations are used for the definitions:

$d_X(i, j)$ : the pairwise distance between  $x_i$  and  $x_j$  in input space  $X$ ;

$d_Z(i, j)$ : the pairwise distance between  $z_i$  and  $z_j$  in latent space  $Z$ ;

$\mathcal{N}_i^{k,X}$ : the set of indices to the  $k$ -nearest neighbor ( $k$ NN) of  $x_i$  in input space  $X$ ;

$\mathcal{N}_i^{k,Z}$ : the set of indices to the  $k$ -nearest neighbor ( $k$ NN) of  $z_i$  in latent space  $Z$ ;

$r_X(i, j)$ : the rank of the closeness (in Euclidean distance) of  $x_j$  to  $x_i$  in input space  $X$ ;

$r_Z(i, j)$ : the rank of the closeness (in Euclidean distance) of  $z_j$  to  $z_i$  in latent space  $Z$ .

The eight evaluation metrics are defined below:

- (1) **ACC** (Accuracy) measures the accuracy of clustering:

$$ACC = \max_m \frac{\sum_{i=1}^N \mathbf{1}\{l_i = m(s_i)\}}{N}$$

where  $l_i$  and  $s_i$  are the true and predicted labels for data point  $x_i$ , respectively, and  $m(\cdot)$  is all possible one-to-one mappings between clusters and label categories.

- (2) **NMI** (Normalized Mutual Information) NMI calculates the normalized measure of similarity between two labels of the same data

$$NMI = \frac{I(l; s)}{\max\{H(l), H(s)\}}$$

where  $I(l, s)$  is the mutual information between the real label  $l$  and predicted label  $s$ , and  $H(\cdot)$  represents their entropy.

- (3) **RRE** (Relative Rank Change) measures the average of changes in neighbor ranking between two spaces  $X$  and  $Z$ :

$$RRE = \frac{1}{(k_2 - k_1 + 1)} \sum_{k=k_1}^{k_2} \{MR_{X \rightarrow Z}^k + MR_{Z \rightarrow X}^k\}$$

where  $k_1$  and  $k_2$  are the lower and upper bounds of the  $k$ -NN.

$$MR_{X \rightarrow Z}^k = \frac{1}{H_k} \sum_{i=1}^N \sum_{j \in \mathcal{N}_i^{k,Z}} \left( \frac{|r_X(i, j) - r_Z(i, j)|}{r_Z(i, j)} \right)$$

$$MR_{Z \rightarrow X}^k = \frac{1}{H_k} \sum_{i=1}^N \sum_{j \in \mathcal{N}_i^{k,X}} \left( \frac{|r_X(i, j) - r_Z(i, j)|}{r_X(i, j)} \right)$$

where  $H_k$  is the normalizing term, defined as

$$H_k = N \sum_{l=1}^k \frac{|N - 2l|}{l}$$

- (4) **Trust** (Trustworthiness) measures to what extent the  $k$  nearest neighbors of a point are preserved when going from the input space to the latent space:

$$Trust = \frac{1}{k_2 - k_1 + 1} \sum_{k=k_1}^{k_2} \left\{ 1 - \frac{2}{Nk(2N - 3k - 1)} \sum_{i=1}^N \sum_{j \in \mathcal{N}_i^{k,Z}, j \notin \mathcal{N}_i^{k,X}} (r_X(i, j) - k) \right\}$$

where  $k_1$  and  $k_2$  are the bounds of the number of nearest neighbors.

- (5) **Cont** (Continuity) is defined analogously to *Trust*, but checks to what extent neighbors are preserved when going from the latent space to the input space:

$$Cont = \frac{1}{k_2 - k_1 + 1} \sum_{k=k_1}^{k_2} \left\{ 1 - \frac{2}{Nk(2N - 3k - 1)} \sum_{i=1}^N \sum_{j \notin \mathcal{N}_i^{k,Z}, j \in \mathcal{N}_i^{k,X}} (r_Z(i, j) - k) \right\}$$

Table A2. Parameter Sensitivity with different parameters  $k$  and  $\kappa$  on the MNIST-test dataset.

| Parameters       | ACC/NMI $\uparrow$ | RRE $\downarrow$ | Trust $\uparrow$ | Cont $\uparrow$ | $d$ -RMSE $\downarrow$ | LGD $\downarrow$ | CRA $\uparrow$ |
|------------------|--------------------|------------------|------------------|-----------------|------------------------|------------------|----------------|
| $k=1, \kappa=3$  | <b>0.975/0.936</b> | 0.0125           | 0.9944           | 0.9756          | 5.757                  | <b>0.8868</b>    | 1.00           |
| $k=3, \kappa=3$  | 0.973/0.931        | 0.0114           | 0.9970           | 0.9757          | 5.805                  | 0.9207           | 1.00           |
| $k=5, \kappa=3$  | 0.972/0.930        | 0.0109           | 0.9981           | 0.9761          | 5.800                  | 0.9339           | 1.00           |
| $k=8, \kappa=3$  | 0.972/0.929        | <b>0.0104</b>    | 0.9989           | <b>0.9765</b>   | 5.810                  | 0.9476           | 1.00           |
| $k=10, \kappa=3$ | 0.972/0.929        | 0.0105           | <b>0.9990</b>    | 0.9764          | <b>5.704</b>           | 0.9487           | 1.00           |
| $k=5, \kappa=1$  | 0.967/0.912        | <b>0.0068</b>    | <b>0.9993</b>    | <b>0.9845</b>   | <b>5.409</b>           | <b>0.2524</b>    | 1.00           |
| $k=5, \kappa=3$  | <b>0.972/0.930</b> | 0.0109           | 0.9981           | 0.9761          | 5.800                  | 0.9339           | 1.00           |
| $k=5, \kappa=5$  | 0.972/0.929        | 0.0146           | 0.9964           | 0.9691          | 15.0653                | 1.5719           | 1.00           |
| $k=5, \kappa=8$  | 0.972/0.929        | 0.0190           | 0.9943           | 0.9615          | 29.4607                | 2.5410           | 1.00           |
| $k=5, \kappa=10$ | 0.972/0.929        | 0.0195           | 0.9951           | 0.9597          | 37.7661                | 3.1434           | 1.00           |

where  $k_1$  and  $k_2$  are the bounds of the number of nearest neighbors.

- (6)  $d$ -RMSE (Root Mean Square Error) measures to what extent the two distributions of **distances** coincide:

$$d - RMSE = \sqrt{\frac{1}{N^2} \sum_{i=1}^N \sum_{j=1}^N (d_X(i, j) - d_Z(i, j))^2}$$

- (7) **LGD** (Locally Geometric Distortion) measures how much corresponding distances between neighboring points differ in two metric spaces and is the primary metric for isometry, defined as:

$$LGD = \sum_{k=k_1}^{k_2} \sqrt{\frac{\sum_{j \in \mathcal{N}_i^{k, (v)}}^M (d_i(i, j) - d_{i'}(i, j))^2}{(k_2 - k_1 + 1)^2 M(\#\mathcal{N}_i)}}$$

where  $k_1$  and  $k_2$  are the lower and upper bounds of the  $k$ -NN.

- (8) **CRA** (Cluster Rank Accuracy) measures the changes in *ranks* of cluster centers from the input space  $X$  and to the latent space  $Z$ :

$$CRA = \frac{\sum_{i=1}^C \sum_{j=1}^C \mathbf{1}(r_X(v_i^X, v_j^X) = r_Z(v_i^Z, v_j^Z))}{C^2}$$

where  $C$  is the number of clusters,  $v_j^X$  is the cluster center of the  $j$ th cluster in the input space  $X$ ,  $v_j^Z$  is the cluster center of the  $j$ th cluster in the latent space  $Z$ ,  $r_X(v_i^X, v_j^X)$  denotes the rank of the closeness (in terms of Euclidean distance) of  $v_i^X$  to  $v_j^X$  in space  $X$  in the input space  $X$ , and  $r_Z(v_i^Z, v_j^Z)$  denotes the rank of the closeness (in terms of Euclidean distance) of  $v_i^Z$  to  $v_j^Z$  in space  $Z$ .

## A.4 Parameter Sensitivity

We also evaluated the sensitivity of parameters  $k$  and  $\kappa$  on the MNIST-test dataset and the results are shown in Tab. A2. It is found that the clustering performance is not sensitive to parameters  $k$  and  $\kappa$ , and some combinations of  $k$  and  $\kappa$  even produce better clustering performance than the metrics reported in the main paper. However, the effect of  $k$  and  $\kappa$  on multi-manifold learning is more pronounced, and different combinations of  $k$  and  $\kappa$  may increase or decrease performance. In general, this paper focuses on the design of algorithms and implementations, and no hyperparameter search is performed to find the best performance metrics.

## A.5 Evaluation of Multi-Manifold Learning

GCML is compared with other methods on six manifold-related *quantitative metrics* to demonstrate its performance advantage for multi-manifold learning, and the complete results on seven datasets are shown on the left side of Tab. A3. In addition, the right side of Tab. A3 compares GCML with other methods on all datasets to see if these methods can really learn embeddings that are useful for downstream tasks. As shown in the table, GCML outperforms all the other methods with MLP, RFC, and LR as downstream tasks.

## A.6 More Ablation Study Experiments

The results of the ablation study on the MNIST-full dataset have been presented in Tab. 4 in Sec 4.4. Here, we provide complete ablation study results on all datasets in Tab. A4. The conclusion is similar (note that the clustering performance of the model without clustering-oriented losses is very poorly, so the “best” metric numbers are not meaningful and are marked in gray color): (1) CL is very important for obtaining good clustering. (2) SL is beneficial for both clustering and multi-manifold learning. (3) The training strategies (WC and AT) contribute to improving performance metrics such as RRE, Trust, Cont, and CRA.

Table A3. Performance for multi-manifold learning (left) and downstream tasks (right) on all seven datasets.

| Datasets      | Algorithms  | RRE↓           | Trust↑         | Cont↑          | d-RMSE↓        | LGD↓           | CRA↑        | MLP↑          | RFC↑          | SVM↑          | LR↑           |
|---------------|-------------|----------------|----------------|----------------|----------------|----------------|-------------|---------------|---------------|---------------|---------------|
| MNIST-full    | DEC         | 0.09988        | 0.84499        | 0.94805        | 44.8535        | 4.37986        | 0.28        | 0.8647        | 0.8706        | 0.8707        | 0.8566        |
|               | IDEC        | 0.00984        | 0.99821        | 0.97936        | 24.5803        | 1.71484        | 0.33        | 0.9797        | 0.9737        | 0.9852        | 0.9650        |
|               | JULE        | 0.02657        | 0.93675        | 0.98321        | 28.3412        | 2.12955        | 0.27        | 0.9802        | 0.9825        | 0.9787        | 0.9743        |
|               | DSC         | 0.09785        | 0.87315        | 0.92508        | 6.98098        | 1.19886        | 0.23        | 0.9622        | 0.9501        | 0.9837        | 0.9752        |
|               | N2D         | 0.01002        | 0.99243        | 0.98466        | 5.7162         | 0.69946        | 0.21        | 0.9796        | 0.9803        | 0.9799        | 0.9792        |
|               | GCML (ours) | <b>0.00567</b> | <b>0.99978</b> | <b>0.98716</b> | <b>5.4986</b>  | <b>0.69168</b> | <b>1.00</b> | <b>0.9851</b> | <b>0.9874</b> | <b>0.9869</b> | <b>0.9841</b> |
| MNIST-test    | DEC         | 0.12800        | 0.81841        | 0.91767        | 14.6113        | 2.29499        | 0.19        | 0.8525        | 0.8605        | 0.8725        | 0.8685        |
|               | IDEC        | 0.01505        | 0.99403        | 0.97082        | 7.4599         | 1.08350        | 0.38        | 0.9740        | 0.9725        | 0.9845        | 0.9655        |
|               | JULE        | 0.04122        | 0.92971        | 0.97208        | 9.4768         | 1.17176        | 0.42        | 0.9775        | 0.9845        | 0.9800        | 0.9825        |
|               | DSC         | 0.10728        | 0.85498        | 0.92254        | 7.1689         | 1.19239        | 0.26        | 0.9535        | 0.9740        | 0.9825        | 0.9795        |
|               | N2D         | 0.01565        | 0.98764        | 0.97572        | <b>5.0120</b>  | 0.97454        | 0.33        | 0.9715        | 0.9760        | 0.9725        | 0.9725        |
|               | GCML (ours) | <b>0.01090</b> | <b>0.99811</b> | <b>0.97612</b> | 5.8000         | <b>0.93394</b> | <b>1.00</b> | <b>0.9855</b> | <b>0.9875</b> | <b>0.9865</b> | <b>0.9855</b> |
| USPS          | DEC         | 0.07911        | 0.88871        | 0.94628        | 16.4355        | 1.77848        | 0.31        | 0.8289        | 0.8668        | 0.8289        | 0.8294        |
|               | IDEC        | 0.01043        | 0.99726        | 0.97960        | 13.0573        | 1.11689        | 0.30        | 0.9482        | 0.9556        | 0.9656        | 0.9125        |
|               | JULE        | 0.02972        | 0.98763        | 0.98810        | 14.6324        | 1.43426        | 0.33        | 0.9576        | 0.9617        | <b>0.9703</b> | 0.9476        |
|               | DSC         | 0.06319        | 0.9151         | 0.93988        | 8.4412         | 1.02131        | 0.27        | 0.9351        | 0.9572        | 0.9612        | 0.9342        |
|               | N2D         | 0.01337        | 0.98769        | 0.98135        | 8.1961         | 0.54967        | 0.37        | 0.9569        | 0.9569        | 0.9569        | 0.9541        |
|               | GCML (ours) | <b>0.00577</b> | <b>0.99979</b> | <b>0.98701</b> | <b>6.4980</b>  | <b>0.53180</b> | <b>1.00</b> | <b>0.9656</b> | <b>0.9651</b> | <b>0.9604</b> | <b>0.9551</b> |
| Fashion-MNIST | DEC         | 0.04787        | 0.93896        | 0.95450        | 39.3274        | 3.87731        | 0.37        | 0.6268        | 0.9853        | 0.6377        | 0.6245        |
|               | IDEC        | 0.01089        | 0.99683        | 0.97797        | 25.4024        | 1.91385        | 0.27        | 0.8367        | 0.9918        | <b>0.8607</b> | 0.7514        |
|               | JULE        | 0.03013        | 0.97732        | 0.97923        | 15.2213        | 1.43642        | 0.43        | 0.8541        | 0.9892        | 0.8566        | 0.7723        |
|               | DSC         | 0.05168        | 0.95013        | 0.96121        | 17.2201        | 1.42091        | 0.36        | 0.8084        | 0.9823        | 0.8618        | 0.7676        |
|               | N2D         | 0.00894        | 0.99062        | 0.98054        | 14.49079       | <b>1.28180</b> | 0.26        | 0.8412        | 0.9493        | 0.8230        | 0.7753        |
|               | GCML (ours) | <b>0.00836</b> | <b>0.99868</b> | <b>0.98203</b> | <b>13.3788</b> | 1.33893        | <b>1.00</b> | <b>0.8642</b> | <b>0.9942</b> | 0.8468        | <b>0.7768</b> |
| REUTERS-10K   | DEC         | 0.26192        | 0.65518        | 0.80477        | 40.4671        | 4.00423        | 0.63        | 0.7985        | 0.7880        | 0.8105        | 0.7450        |
|               | IDEC        | 0.05981        | 0.95840        | 0.90550        | 43.9556        | 2.01365        | 0.75        | 0.9225        | 0.8930        | 0.9280        | 0.7705        |
|               | JULE        | -              | -              | -              | -              | -              | -           | -             | -             | -             | -             |
|               | DSC         | -              | -              | -              | -              | -              | -           | -             | -             | -             | -             |
|               | N2D         | 0.03827        | 0.97385        | 0.93412        | 36.1042        | <b>1.69013</b> | 0.31        | 0.9205        | 0.9080        | 0.9240        | 0.8335        |
|               | GCML (ours) | <b>0.03206</b> | <b>0.98380</b> | <b>0.93802</b> | <b>34.5478</b> | 2.72096        | <b>1.00</b> | <b>0.9360</b> | <b>0.9185</b> | <b>0.9390</b> | <b>0.8475</b> |
| HAR           | DEC         | 0.09060        | 0.89097        | 0.91766        | 10.0222        | 1.58691        | 0.30        | 0.7696        | 0.7847        | 0.7628        | 0.7634        |
|               | IDEC        | 0.01031        | 0.99433        | 0.98132        | 9.9155         | 0.93736        | 0.39        | 0.8973        | 0.9031        | 0.9041        | 0.8822        |
|               | JULE        | -              | -              | -              | -              | -              | -           | -             | -             | -             | -             |
|               | DSC         | -              | -              | -              | -              | -              | -           | -             | -             | -             | -             |
|               | N2D         | 0.00841        | 0.99281        | 0.97695        | <b>8.2326</b>  | 0.64296        | 0.33        | 0.9138        | 0.9083        | 0.9174        | 0.8799        |
|               | GCML (ours) | <b>0.00665</b> | <b>0.99895</b> | <b>0.98634</b> | 15.2876        | <b>0.46189</b> | <b>1.00</b> | <b>0.9235</b> | <b>0.9193</b> | <b>0.9293</b> | <b>0.8996</b> |
| pendigits     | DEC         | 0.03932        | 0.95149        | 0.96300        | 21.6608        | 1.32970        | 0.24        | 0.7215        | 0.8432        | 0.7376        | 0.7429        |
|               | IDEC        | 0.00384        | 0.99879        | 0.99255        | 19.7243        | 0.86137        | 0.28        | 0.8870        | 0.9461        | <b>0.9595</b> | 0.8636        |
|               | JULE        | -              | -              | -              | -              | -              | -           | -             | -             | -             | -             |
|               | DSC         | -              | -              | -              | -              | -              | -           | -             | -             | -             | -             |
|               | N2D         | 0.00262        | 0.99919        | 0.99473        | 20.7052        | 0.76941        | 0.42        | 0.9131        | 0.9669        | 0.9528        | 0.8516        |
|               | GCML (ours) | <b>0.00091</b> | <b>0.99994</b> | <b>0.99808</b> | <b>2.5184</b>  | <b>0.08223</b> | <b>1.00</b> | <b>0.9538</b> | <b>0.9705</b> | 0.9532        | <b>0.8953</b> |

Table A4. Ablation study of loss items and training strategies used in the proposed GCML framework.

| Datasets      | Methods    | ACC/NMI $\uparrow$ | RRE $\downarrow$ | Trust $\uparrow$ | Cont $\uparrow$ | $d$ -RMSE $\downarrow$ | LGD $\downarrow$ | CRA $\uparrow$ |
|---------------|------------|--------------------|------------------|------------------|-----------------|------------------------|------------------|----------------|
| MNIST-full    | w/o SL     | 0.976/0.939        | 0.0093           | 0.9967           | 0.9816          | 24.589                 | 1.6747           | 0.32           |
|               | w/o CL     | 0.814/0.736        | 0.0004           | 0.9998           | 0.9990          | 7.458                  | 0.0487           | 1.00           |
|               | w/o WC     | 0.977/0.943        | 0.0065           | 0.9987           | 0.9860          | 5.576                  | 0.6968           | 0.98           |
|               | w/o AT     | 0.978/0.944        | 0.0069           | 0.9986           | 0.9851          | 5.617                  | 0.7037           | 0.96           |
|               | full model | <b>0.980/0.946</b> | <b>0.0056</b>    | <b>0.9997</b>    | <b>0.9871</b>   | <b>5.498</b>           | <b>0.6916</b>    | <b>1.00</b>    |
| MNIST-test    | w/o SL     | <b>0.973/0.932</b> | 0.0146           | 0.9928           | 0.9727          | 7.701                  | 1.0578           | 0.31           |
|               | w/o CL     | 0.773/0.747        | 0.0020           | 0.9994           | 0.9954          | 7.229                  | 0.0809           | 1.00           |
|               | w/o WC     | 0.956/0.904        | 0.0132           | 0.9955           | 0.9735          | <b>5.470</b>           | 0.9364           | <b>1.00</b>    |
|               | w/o AT     | 0.970/0.929        | 0.0118           | 0.9974           | 0.9747          | 5.567                  | 0.9404           | <b>1.00</b>    |
|               | full model | 0.972/0.930        | <b>0.0109</b>    | <b>0.9981</b>    | <b>0.9761</b>   | 5.800                  | <b>0.9339</b>    | <b>1.00</b>    |
| USPS          | w/o SL     | 0.957/0.902        | 0.0095           | 0.9967           | 0.9812          | 14.609                 | 0.9847           | 0.29           |
|               | w/o CL     | 0.664/0.658        | 0.0020           | 0.9996           | 0.9952          | 2.934                  | 0.0687           | 1.0            |
|               | w/o WC     | 0.956/0.896        | 0.0060           | 0.9991           | 0.9868          | 6.572                  | 0.5335           | <b>1.00</b>    |
|               | w/o AT     | 0.947/0.885        | 0.0080           | 0.9979           | 0.9833          | <b>5.960</b>           | <b>0.4967</b>    | <b>1.00</b>    |
|               | full model | <b>0.958/0.902</b> | <b>0.0057</b>    | <b>0.9997</b>    | <b>0.9870</b>   | 6.498                  | 0.5318           | <b>1.00</b>    |
| Fashion-MNIST | w/o SL     | 0.706/0.682        | 0.0108           | 0.9964           | 0.9781          | 25.954                 | 1.8936           | 0.30           |
|               | w/o CL     | 0.576/0.569        | 0.0004           | 0.9994           | 0.9995          | 7.654                  | 0.0523           | 1.00           |
|               | w/o WC     | 0.702/0.695        | 0.0084           | 0.9972           | 0.9814          | <b>13.238</b>          | 1.3474           | <b>1.00</b>    |
|               | w/o AT     | 0.708/0.694        | 0.0097           | 0.9975           | 0.9798          | 13.354                 | 1.3611           | <b>1.00</b>    |
|               | full model | <b>0.710/0.685</b> | <b>0.0083</b>    | <b>0.9986</b>    | <b>0.9820</b>   | 13.378                 | <b>1.3389</b>    | <b>1.00</b>    |
| REUTERS-10K   | w/o SL     | 0.819/0.564        | 0.0529           | 0.9610           | 0.9185          | 44.481                 | 1.9090           | 0.38           |
|               | w/o CL     | 0.542/0.279        | 0.0277           | 0.9868           | 0.9456          | 37.018                 | 2.2294           | 1.00           |
|               | w/o WC     | 0.830/0.583        | 0.0420           | 0.9667           | 0.9361          | 35.302                 | 2.8286           | <b>1.00</b>    |
|               | w/o AT     | 0.825/0.563        | 0.0440           | 0.9650           | 0.9330          | 39.275                 | 2.9146           | <b>1.00</b>    |
|               | full model | <b>0.836/0.590</b> | <b>0.0320</b>    | <b>0.9838</b>    | <b>0.9380</b>   | <b>34.547</b>          | <b>2.7209</b>    | <b>1.00</b>    |
| HAR           | w/o SL     | 0.835/0.746        | 0.0116           | 0.9944           | 0.9792          | <b>8.168</b>           | 0.8882           | 0.33           |
|               | w/o CL     | 0.744/0.615        | 0.0024           | 0.9986           | 0.9948          | 15.060                 | 0.2193           | 1.00           |
|               | w/o WC     | 0.786/0.701        | 0.0130           | 0.9950           | 0.9756          | 15.398                 | 0.6171           | <b>1.00</b>    |
|               | w/o AT     | 0.834/0.745        | 0.0089           | 0.9965           | 0.9835          | 15.726                 | 0.4734           | <b>1.00</b>    |
|               | full model | <b>0.844/0.862</b> | <b>0.0066</b>    | <b>0.9989</b>    | <b>0.9863</b>   | 15.287                 | <b>0.4618</b>    | <b>1.00</b>    |
| pendigits     | w/o SL     | 0.843/0.803        | 0.0027           | 0.9989           | 0.9948          | 20.692                 | 0.7587           | 0.31           |
|               | w/o CL     | 0.773/0.705        | 0.0004           | 0.9998           | 0.9992          | 2.177                  | 0.0385           | 1.00           |
|               | w/o WC     | 0.840/0.790        | 0.0014           | 0.9995           | 0.9972          | 2.690                  | 0.1124           | <b>1.00</b>    |
|               | w/o AT     | 0.842/0.804        | 0.0018           | 0.9991           | 0.9965          | 2.756                  | 0.1148           | <b>1.00</b>    |
|               | full model | <b>0.855/0.814</b> | <b>0.0009</b>    | <b>0.9999</b>    | <b>0.9981</b>   | <b>2.518</b>           | <b>0.0822</b>    | <b>1.00</b>    |
